# Supplementary material for: Three novel polyoxometalate-based inorganic–organic hybrid materials based on 2,6-bis(1,2,4-triazol-1-yl)pyridine
Source: Royal Society of Chemistry journal article supplement (doi:10.1039/c9ra01451a), 2019-01-01
Supplement: c9ra01451a1.pdf [file c9ra01451a1.pdf]

## <Supporting Information>

# Three novel polyoxometalate-based inorganic-organic hybrid materials based on 2,6-bis(1,2,4-triazol-1-yl)pyridine

Yingying Wu, Xuefei Li, Ying Liu, Ge Xiao, Yijiao Huang, Yamin Li \*, Dongbin Dang, Yan Bai \*\*

*(Henan Key Laboratory of Polyoxometalate, Institute of Molecular and Crystal Engineering, College of Chemistry and Chemical Engineering, Henan University, Kaifeng, Henan 475004, PR China)*

### Table of Contents

1. Table S1. Crystal data and refinement for the compounds **1–3**
2. Table S2. Selected bond lengths (Å) and bond angles (°) for compound **1**
3. Table S3. Selected bond lengths (Å) and bond angles (°) for compound **2**
4. Table S4. Selected bond lengths (Å) and bond angles (°) for compound **3**
5. Fig. S1 IR spectra of compounds **1–3** (a–c).
6. Fig. S2 TGA curves of compounds **1–3** (a–c).
7. Fig. S3 PXRD patterns of compounds **1–3** (a–c).
8. Fig. S4 (a), (b), (c) The plots of the anodic and the cathodic peak II–II' currents for **1**–GCE, I–I' currents for **2**–GCE, II–II' currents for **3**–GCE against scan rates.
9. Fig. S5 Absorption spectra of the RhB solutions during the decomposition reaction without catalyst.
10. Fig. S6 (a) Absorption spectra of the RhB (10 mg L<sup>-1</sup>) solution during the decomposition reaction under UV light irradiation with the use of compound **3**. (b) The comparison of the compound and no crystal decomposition rate of RhB in the same conditions.
11. Fig. S7 Solid-state photoluminescence spectra of compounds **1–3** and the btp ligand at the room temperature.
12. Fig. S8 The plot of *M* vs. *H*.

---

\* Corresponding author. Key Laboratory of polyoxometalate Chemistry of Henan Province, majoring in the structure and property of functional materials. School of Chemistry and Chemical Engineering, Henan University, Kaifeng 475004, PR China.

\*\* Corresponding author.

E-mail addresses: [liyamin@henu.edu.cn](mailto:liyamin@henu.edu.cn).

Table S1. Crystal data and refinement for the compounds **1–3**

| Compound                                                                    | <b>1</b>                                                                         | <b>2</b>                                                                                                       | <b>3</b>                                                                                            |
|-----------------------------------------------------------------------------|----------------------------------------------------------------------------------|----------------------------------------------------------------------------------------------------------------|-----------------------------------------------------------------------------------------------------|
| Empirical formula                                                           | CoW <sub>5</sub> C <sub>18</sub> H <sub>16</sub> N <sub>14</sub> O <sub>17</sub> | Cd <sub>3</sub> P <sub>2</sub> W <sub>24</sub> C <sub>54</sub> H <sub>66</sub> N <sub>42</sub> O <sub>92</sub> | Ag <sub>3</sub> PMo <sub>12</sub> C <sub>18</sub> H <sub>17</sub> N <sub>14</sub> O <sub>41.5</sub> |
| Formula weight                                                              | 1678.63                                                                          | 7587.02                                                                                                        | 2599.32                                                                                             |
| Crystal size (mm <sup>3</sup> )                                             | 0.17×0.15×0.11                                                                   | 0.20×0.20×0.20                                                                                                 | 0.20×0.20×0.20                                                                                      |
| Wavelength (Å)                                                              | 0.71073                                                                          | 0.71073                                                                                                        | 0.71073                                                                                             |
| Crystal system                                                              | Orthorhombic                                                                     | Cubic                                                                                                          | Monoclinic                                                                                          |
| Space group                                                                 | <i>Cccm</i>                                                                      | <i>Ia-3</i>                                                                                                    | <i>P2<sub>1</sub>/n</i>                                                                             |
| <i>a</i> (Å)                                                                | 13.0024(8)                                                                       | 30.375(4)                                                                                                      | 11.861(3)                                                                                           |
| <i>b</i> (Å)                                                                | 21.9573(13)                                                                      | 30.375(4)                                                                                                      | 20.437(6)                                                                                           |
| <i>c</i> (Å)                                                                | 22.2526(14)                                                                      | 30.375(4)                                                                                                      | 22.536(6)                                                                                           |
| $\beta$ (°)                                                                 | 90.00                                                                            | 90.00                                                                                                          | 93.471(4)                                                                                           |
| Volume (Å <sup>3</sup> )                                                    | 6353.1(7)                                                                        | 28026(6)                                                                                                       | 5453(2)                                                                                             |
| Temperature (K)                                                             | 296(2)                                                                           | 293(2)                                                                                                         | 296(2)                                                                                              |
| <i>Z</i>                                                                    | 8                                                                                | 8                                                                                                              | 4                                                                                                   |
| <i>D</i> <sub>calcd</sub> (g cm <sup>-3</sup> )                             | 3.510                                                                            | 3.591                                                                                                          | 3.166                                                                                               |
| $\mu$ (mm <sup>-1</sup> )                                                   | 18.643                                                                           | 20.188                                                                                                         | 3.853                                                                                               |
| <i>F</i> (000)                                                              | 6024                                                                             | 26864                                                                                                          | 4860                                                                                                |
| $\theta$ range for data collection (°)                                      | 1.82 to 25.00                                                                    | 2.51 to 24.99                                                                                                  | 2.07 to 25.00                                                                                       |
| <i>R</i> <sub>int</sub>                                                     | 0.0547                                                                           | 0.0675                                                                                                         | 0.0306                                                                                              |
| Index ranges, <i>hkl</i>                                                    | -15 ≤ <i>h</i> ≤ 15, -20 ≤ <i>k</i> ≤ 26, -26 ≤ <i>l</i> ≤ 26                    | -36 ≤ <i>h</i> ≤ 34, -36 ≤ <i>k</i> ≤ 36, -36 ≤ <i>l</i> ≤ 35                                                  | -14 ≤ <i>h</i> ≤ 11, -23 ≤ <i>k</i> ≤ 26, -26 ≤ <i>l</i> ≤ 26                                       |
| Reflections collected                                                       | 2897                                                                             | 4114                                                                                                           | 9456                                                                                                |
| Independent reflections                                                     | 2359                                                                             | 4113                                                                                                           | 8979                                                                                                |
| <i>R</i> <sub>1</sub> , <i>wR</i> <sub>2</sub> ( <i>I</i> > 2σ( <i>I</i> )) | <i>R</i> <sub>1</sub> =0.0305,<br><i>wR</i> <sub>2</sub> =0.0621                 | <i>R</i> <sub>1</sub> =0.0920,<br><i>wR</i> <sub>2</sub> =0.1887                                               | <i>R</i> <sub>1</sub> =0.0329,<br><i>wR</i> <sub>2</sub> =0.0757                                    |
| <i>R</i> <sub>1</sub> , <i>wR</i> <sub>2</sub> (all data)                   | <i>R</i> <sub>1</sub> =0.0428,                                                   | <i>R</i> <sub>1</sub> =0.0920,                                                                                 | <i>R</i> <sub>1</sub> =0.0384,                                                                      |

|                                                         | $wR_2=0.0651$ | $wR_2=0.1887$ | $wR_2=0.0778$ |
|---------------------------------------------------------|---------------|---------------|---------------|
| <i>GOOF</i> on $F^2$                                    | 1.055         | 1.232         | 1.148         |
| Largest diff. peak<br>and hole ( $e \text{ \AA}^{-3}$ ) | 1.46/-1.822   | 4.667/-3.057  | 1.345/-1.009  |

---

$R = \sum(|F_o| - |F_c|) / \sum |F_o|$ ,  $wR = \{ \sum w[(F_o^2 - F_c^2)^2] / \sum w[(F_o^2)^2] \}^{1/2}$ ,  $w = 1 / [\sigma^2(F_o^2) + (ap)^2 + bP]$ ,  $P = (F_o^2 + 2F_c^2) / 3$ . **1:**  $a = 0.0277$ ,  $b = 31.3472$ ; **2:**  $a = 0.0328$ ,  $b = 5173.3159$ ; **3:**  $a = 0.0284$ ,  $b = 21.5563$ .

Table S2. Selected bond lengths (Å) and bond angles (°) for compound 1

| Bond           | (Å)       | Bond          | (Å)       | Bond           | (Å)        |
|----------------|-----------|---------------|-----------|----------------|------------|
| W2–O7 #6       | 1.898(5)  | W4–O10 #6     | 1.895(8)  | W3–O7#7        | 1.913(6)   |
| W1–O4#7        | 1.899(5)  | W4–O8#7       | 1.924(6)  | W2–O8#7        | 1.970(6)   |
| Co1–N1#1       | 2.066(7)  | Co1–N1#4      | 2.066(7)  | Co1–O1W        | 2.320(10)  |
| Co1–N1#2       | 2.066(7)  | Co1–N1        | 2.066(7)  | Co1–O1W #4     | 2.320(10)  |
| O1–Co2         | 2.127(7)  | W2–O4#7       | 1.938(5)  | W3–O2#6        | 2.370(7)   |
| N8–C8 #5       | 1.337(10) | O6–W2#3       | 1.8993(5) | O7–W2#6        | 1.898(5)   |
| O8–W2#7        | 1.970(6)  | O10–W4 #6     | 1.895(8)  | Co2–N2#7       | 2.099(7)   |
| Co2–N2#5       | 2.099(7)  | Co2–N2#8      | 2.099(7)  | Co2–O1#8       | 2.127(7)   |
| Angles         | (°)       | Angles        | (°)       | Angles         | (°)        |
| N1#1–Co1–N1#4  | 176.7(4)  | N1#1–Co1–N1#2 | 88.6(4)   | N1#4–Co1–N1    | 88.6(4)    |
| N1#4–Co1–N1#2  | 91.5(4)   | N1#1–Co1–N1   | 91.5(4)   | N1#1–Co1–O1W   | 91.6(2)    |
| N1#2–Co1–O1W   | 88.4(2)   | N1#2–Co1–N1   | 176.7(4)  | N1–Co1–O1W     | 88.4(2)    |
| N1#1–Co1–O1W#4 | 88.4(2)   | N1#4–Co1–O1W  | 91.6(2)   | N1#4–Co1–O1W#4 | 88.4(2)    |
| N1#2–Co1–O1W#4 | 91.6(2)   | N1–Co1–O1W#4  | 91.6(2)   | O1W–Co1–O1W#4  | 180.000(1) |
| C4–N2–Co2      | 135.4(6)  | C3–N2–Co2     | 121.7(6)  | N2#7–Co2–N2#8  | 88.0(4)    |
| C9#5–C10–H10A  | 121.2     | N2#7–Co2–N2#5 | 180.0(5)  | N2#5–Co2–N2#8  | 92.0(4)    |
| N2#8–Co2–N2    | 180.0(3)  | N2#7–Co2–N2   | 92.0(4)   | N2#5–Co2–N2    | 88.0(4)    |
| N2#5–Co2–O1    | 88.6(2)   | N2#8–Co2–O1   | 88.6(2)   | N2#7–Co2–O1    | 91.4(2)    |
| N2–Co2–O1      | 91.4(2)   | N2#7–Co2–O1#8 | 88.6(2)   | N2#5–Co2–O1#8  | 91.4(2)    |
| N2–Co2–O1#8    | 88.6(2)   | N2#8–Co2–O1#8 | 91.4(2)   |                |            |

Symmetry code for 1: #1:  $x, -y+1/2, -z+1/2$ ; #2:  $-x, -y+1, +z$ ; #3:  $-x, -y, z$ ; #4:  $-x, y, -z+1/2$ ; #5:  $-x+1/2, -y+1/2, z$ ; #6:  $-x, -y, -z$ ; #7:  $x, y, -z$ ; #8:  $-x+1/2, -y+1/2$ .

Table S3. Selected bond lengths (Å) and bond angles (°) for compound 2

| Bond         | (Å)       | Bond           | (Å)       | Bond          | (Å)       |
|--------------|-----------|----------------|-----------|---------------|-----------|
| Cd1–N2#3     | 2.30(2)   | Cd1–N2         | 2.30(2)   | Cd1–O1W       | 2.44(3)   |
| Cd1–N7#7     | 2.35(3)   | Cd1–N7#12      | 2.35(3)   | Cd1–O1W#3     | 2.44(3)   |
| W2–O13#5     | 2.48(3)   | W1–O14#4       | 2.52(3)   | W1–O4#2       | 1.938(18) |
| W1–O8#8      | 1.88(2)   | W2–O7#8        | 1.95(2)   | W3–O11#10     | 1.87(4)   |
| W4–O1#2      | 2.043(11) | W3–O10#10      | 1.91(2)   | O16–O2#10     | 1.54(4)   |
| O1–W4#1      | 2.043(11) | O2–O16#9       | 1.54(4)   | O7–W2#5       | 1.95(2)   |
| O10–W3#11    | 1.91(2)   | O4–W1#1        | 1.938(18) | O11–W3#11     | 1.87(4)   |
| O16–O2#9     | 1.54(4)   | O14–W1#4       | 2.52(3)   | O13–O14#4     | 1.67(4)   |
| N7–Cd1#6     | 2.35(3)   | O14–W1#5       | 2.52(3)   | O16–O2#11     | 1.54(4)   |
| Angles       | (°)       | Angles         | (°)       | Angles        | (°)       |
| N2#3–Cd1–N2  | 96.1(11)  | N2#3–Cd1–N7#7  | 98.2(8)   | N2–Cd1–N7#12  | 98.2(8)   |
| N2–Cd1–N7#7  | 94.8(8)   | N2#3–Cd1–N7#12 | 94.8(8)   | N2#3–Cd1–O1W  | 174.7(10) |
| N7#7–Cd1–O1W | 84.1(10)  | N7#7–Cd1–N7#12 | 160.5(13) | N7#12–Cd1–O1W | 81.8(10)  |

|                |           |                 |           |               |           |
|----------------|-----------|-----------------|-----------|---------------|-----------|
| N2#3–Cd1–O1W#3 | 88.4(10)  | N2–Cd1–O1W      | 88.4(10)  | N2–Cd1–O1W#3  | 174.7(10) |
| N7#7–Cd1–O1W#3 | 81.8(10)  | N7#12–Cd1–O1W#3 | 84.1(10)  | C5–N7–Cd1#6   | 123(2)    |
| O8#8–W1–O14#4  | 91.8(13)  | W3–O10–W3#11    | 140.9(13) | O6–W2–O13#5   | 95.3(12)  |
| O3–W3–O10      | 100.9(12) | O15–W4–O1#2     | 106.5(11) | O12–W3–O11#10 | 153.9(17) |
| O11#10–W3–O10  | 86.9(17)  | O1–W4–O1#2      | 113.2(6)  | O16#9–O2–P2   | 48(2)     |
| W1–O4–W1#1     | 139.3(11) | O13#8–O14–O13#5 | 97(3)     | P2–O2–W4      | 133(2)    |

Symmetry code for 1: #1:  $-z-1/2, -x, y-1/2$ ; #2:  $-y, z+1/2, -x-1/2$ ; #3:  $x+1, -y-1/2, z$ ; #4:  $-x, -y, -z-1$ ; #5:  $z+1/2, x, -y-1/2$ ; #6:  $z+3/2, x-1, -y-3/2$ ; #7:  $y+1, -z-3/2, x-3/2$ ; #8:  $y, -z-1/2, x-1/2$ ; #9:  $-x+1/2, -y-1/2, -z-3/2$ ; #10:  $z+1, x-1/2, -y-1$ ; #11:  $y+1/2, -z-1, x-1$ ; #12:  $-y, z+1, x-3/2$ .

Table S4. Selected bond lengths (Å) and bond angles (°) for compound **3**

| Bond          | (Å)        | Bond         | (Å)        | Bond          | (Å)        |
|---------------|------------|--------------|------------|---------------|------------|
| Ag1–N11       | 2.161(5)   | Ag1–N11#4    | 2.161(5)   | Ag2–N3        | 2.528(5)   |
| Ag2–N14#1     | 2.222(5)   | Ag2–N2       | 2.315(5)   | Ag2–N4        | 2.564(6)   |
| Ag3–N1#3      | 2.143(5)   | Ag4–N5       | 2.251(5)   | Ag4–N9        | 2.305(5)   |
| Ag4–N8        | 2.514(5)   | N14–Ag2#2    | 2.222(5)   | Mo1–O33       | 1.858(4)   |
| Angles        | (°)        | Angles       | (°)        | Angles        | (°)        |
| N11–Ag1–N11#4 | 180.0      | N14#1–Ag2–N2 | 129.96(19) | N14#1–Ag2–N4  | 90.3(2)    |
| N11#1–Ag2–N3  | 134.44(17) | N2–Ag2–N3    | 67.25(17)  | N3–Ag2–N4     | 62.42(16)  |
| N5–Ag4–N9     | 129.62(19) | N5–Ag4–N8    | 130.75(18) | N2–Ag2–N4     | 129.53(17) |
| N9–Ag4–N8     | 67.47(16)  | C1–N4–Ag2    | 135.1(5)   | N1#3–Ag3–N1   | 179.998(1) |
| C2–N1–Ag3     | 138.7(4)   | N7–N4–Ag2    | 118.6(4)   | C9–N2–Ag2     | 137.1(4)   |
| N6–N2–Ag2     | 120.0(4)   | C1–N1–Ag3    | 118.2(4)   | C8–N5–Ag4     | 130.6(4)   |
| C3–N3–Ag2     | 124.9(4)   | C7–N3–Ag2    | 117.4(4)   | C8–N6–N2      | 108.9(5)   |
| C10–N8–Ag4    | 125.5(4)   | C9–N5–Ag4    | 125.8(4)   | C14–N8–Ag4    | 117.2(4)   |
| C18–N9–Ag4    | 137.4(5)   | N13–N9–Ag4   | 119.1(4)   | C18–N14–Ag2#2 | 126.5(4)   |
| C16–N11–Ag1   | 135.4(4)   | C17–N11–Ag1  | 121.6(4)   | C15–N14–Ag2#2 | 129.7(4)   |

Symmetry code for 1: #1:  $x-1, y, z$ ; #2:  $x+1, y, z$ ; #3:  $-x-1, -y+2, -z-1$ ; #4:  $-x, -y+3, -z-1$ .

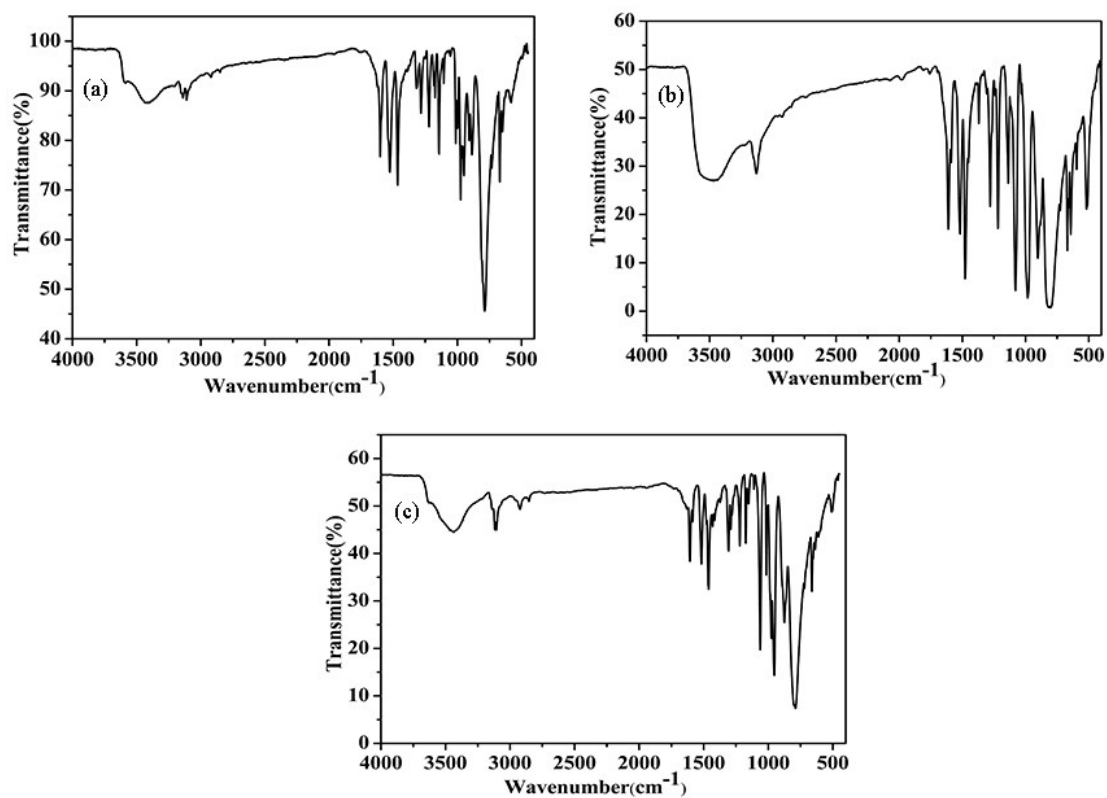

Fig. S1 IR spectra of compounds **1-3** (a-c).

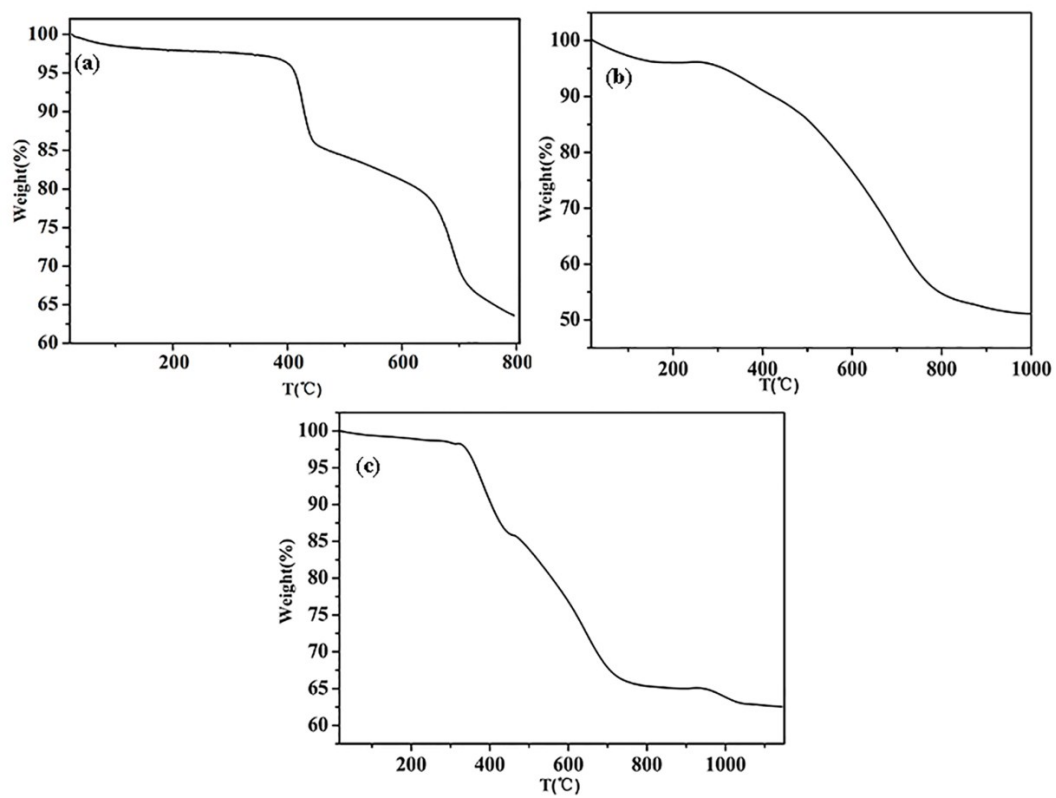

Fig. S2 TGA curves of compounds **1-3** (a-c).

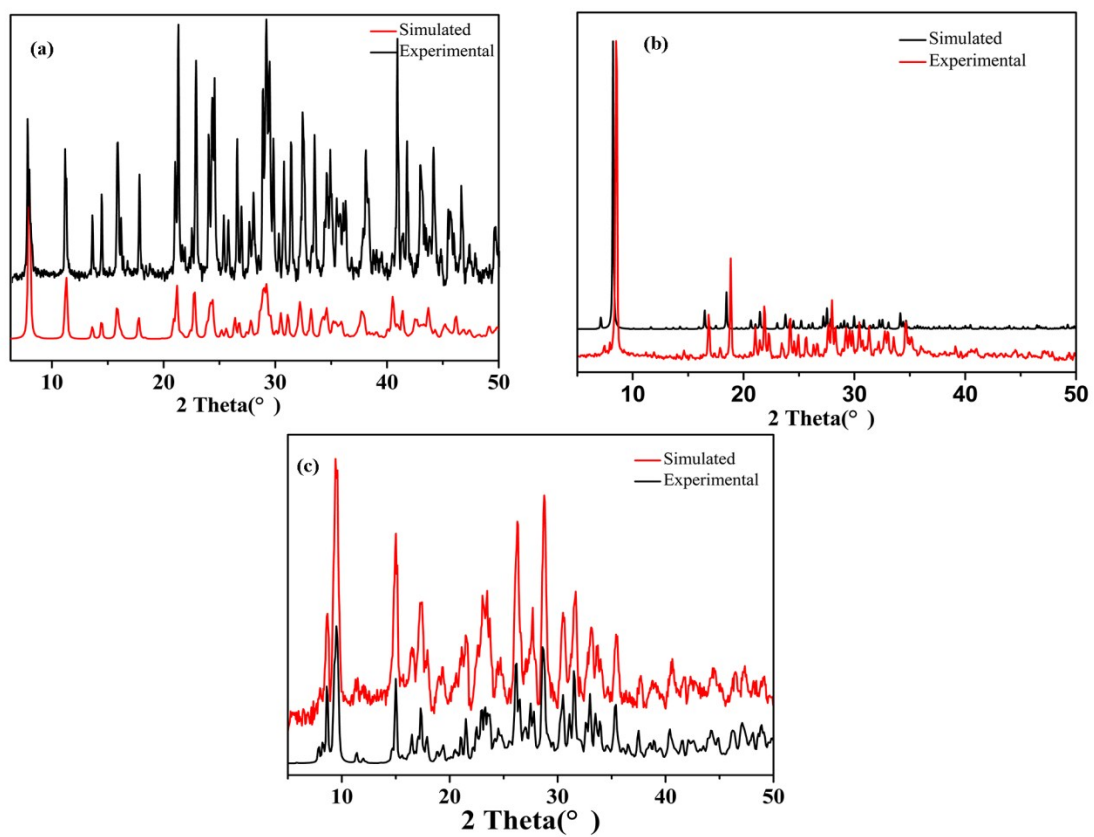

Fig. S3 PXRD patterns of compounds 1–3 (a–c).

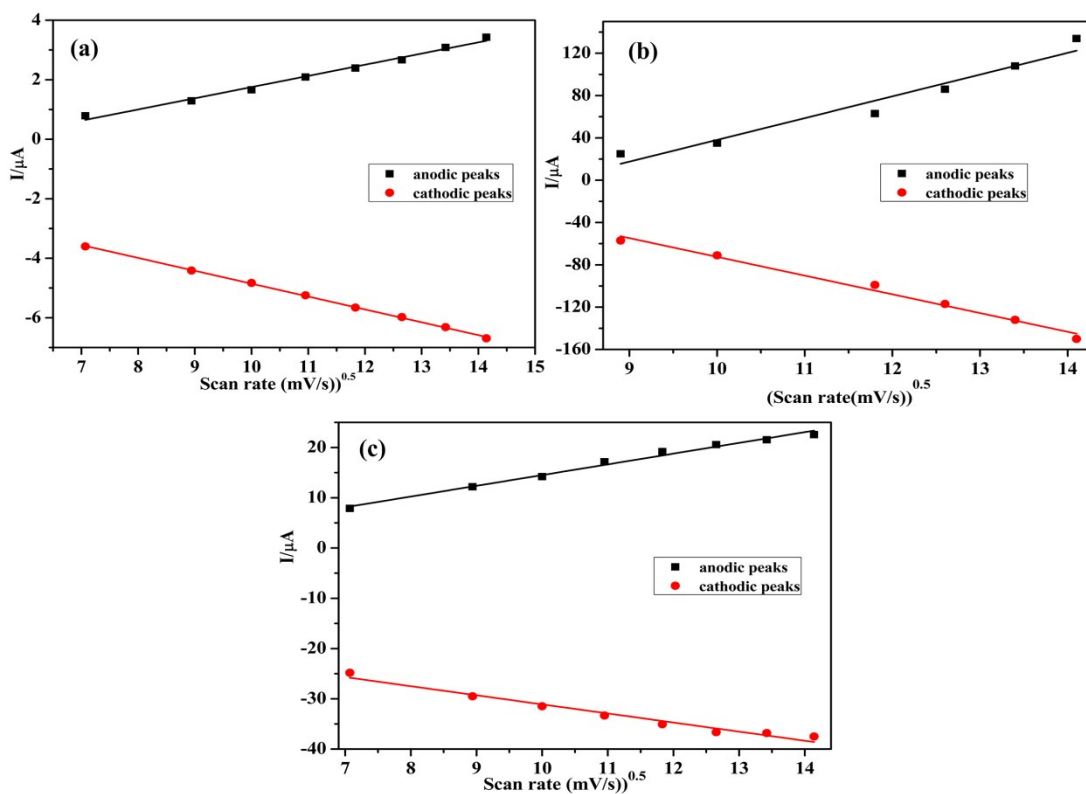

Fig. S4 (a), (b), (c) The plots of the anodic and the cathodic peak II-II' currents for 1-GCE, I-I' currents for 2-GCE, II-II' currents for 3-GCE against scan rates.

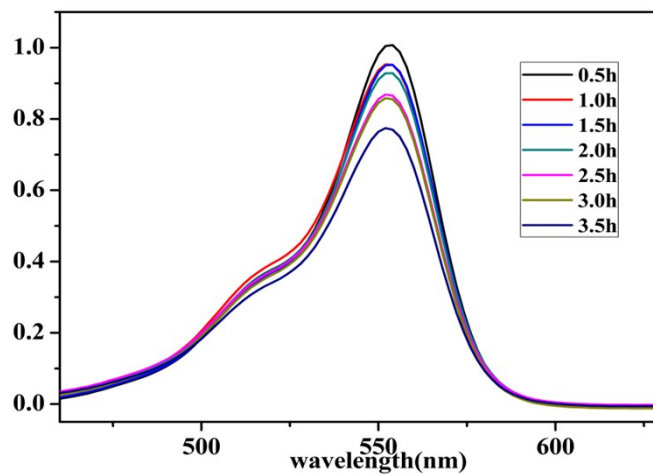

Fig. S5 Absorption spectra of the RhB solutions during the decomposition reaction without catalyst.



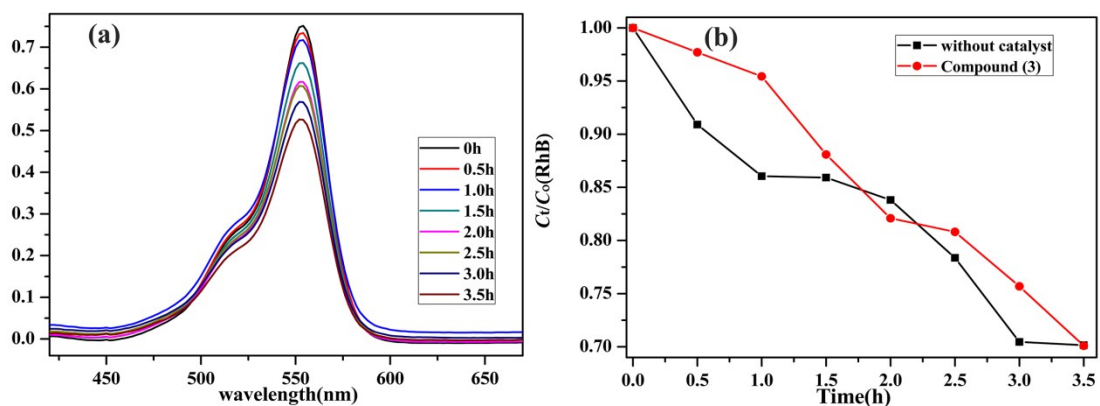

Fig. S6 (a) Absorption spectra of the RhB ( $10 \text{ mg L}^{-1}$ ) solution during the decomposition reaction under UV light irradiation with the use of compound **3**. (b) The comparison of the compound and no crystal decomposition rate of RhB in the same conditions.

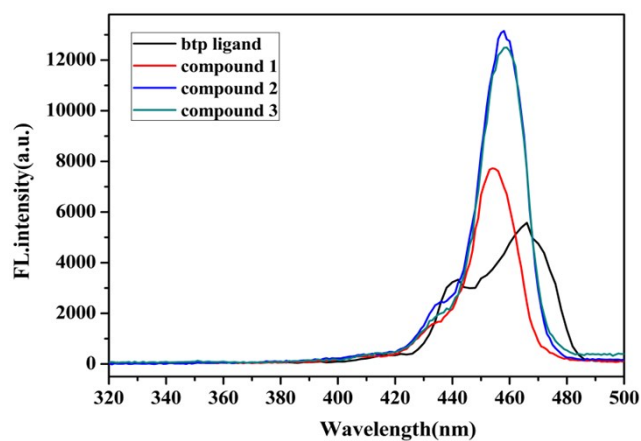

Fig. S7 Solid-state photoluminescence spectra of compounds **1–3** and the btp ligand at the room temperature.

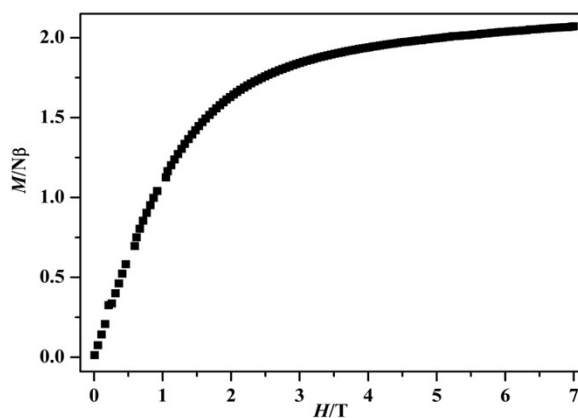

Fig. S8 The plot of  $M$  vs.  $H$ .
